# Supplementary material for: Discrete choice experiment to investigate preferences for psychological intervention in cardiac rehabilitation
Source: HighWire-hosted journal article supplement (doi:10.1136/bmjopen-2022-062503), 2022-11-01

# A discrete choice experiment to investigate preferences for psychological intervention in cardiac rehabilitation

Corresponding author: gemma.shields@manchester.ac.uk

## Supplementary material

**Supplementary Table 1 Preliminary conditional logit results**

| Attribute/level                                                                                                                         | General population sample<br>Coef. (SE; p) | Trial sample<br>Coef. (SE; p) | All respondents<br>Coef. (SE; p) |
|-----------------------------------------------------------------------------------------------------------------------------------------|--------------------------------------------|-------------------------------|----------------------------------|
| <b>Psychological intervention to be received alongside your standard cardiac rehabilitation programme</b>                               |                                            |                               |                                  |
| Peer group support that provides non-specific support and advice                                                                        | -0.012 (0.041; 0.770)                      | 0.006 (0.100; 0.952)          | -0.005 (0.038; 0.893)            |
| Group psychological therapy where you are not required to share detailed information about personal concerns/experiences                | -0.111 (0.042; 0.008)*                     | 0.039 (0.103; 0.705)          | -0.091 (0.038; 0.018)*           |
| Group psychological therapy where you may be required to share detailed information about personal concerns/experiences                 | -0.194 (0.045; 0.000)*                     | -0.106 (0.109; 0.328)         | -0.189 (0.041; 0.000)*           |
| Individual psychological therapy                                                                                                        | 0.318 (0.040; 0.000)*                      | 0.061 (0.103; 0.552)          | 0.285 (0.037; 0.000)*            |
| <b>The person who provides the psychological therapy</b>                                                                                |                                            |                               |                                  |
| Occupational therapist trained to deliver psychological therapy                                                                         | -0.021 (0.042; 0.610)                      | -0.025 (0.102; 0.806)         | -0.027 (0.038; 0.487)            |
| Cardiac rehabilitation professional trained in delivery of psychological therapy                                                        | 0.074 (0.041; 0.068)                       | 0.461 (0.102; 0.000)*         | 0.128 (0.037; 0.001)*            |
| Health care professional trained in delivery of psychological intervention, no background in cardiac rehabilitation or psychology       | -0.079 (0.043; 0.064)                      | -0.429 (0.109; 0.000)*        | -0.126 (0.039; 0.001)*           |
| Clinical psychologist                                                                                                                   | 0.026 (0.042; 0.538)                       | -0.007 (0.103; 0.942)         | 0.025 (0.039; 0.516)             |
| <b>The information given to you prior to accepting and starting treatment that gives you an idea of what to expect from the therapy</b> |                                            |                               |                                  |
| No information provided                                                                                                                 | -0.139 (0.043; 0.001)*                     | -0.209 (0.106; 0.049)*        | -0.140 (0.039; 0.000)*           |
| A printed leaflet of information                                                                                                        | -0.032 (0.042; 0.454)                      | -0.007 (0.106; 0.951)         | -0.026 (0.039; 0.502)            |
| An overview of the therapy from a healthcare provider with a chance to ask questions                                                    | 0.107 (0.041; 0.009)*                      | 0.204 (0.100; 0.043)*         | 0.115 (0.037; 0.002)*            |
| An overview of the therapy from a healthcare provider with a chance to ask questions and a printed leaflet                              | 0.064 (0.041; 0.123)                       | 0.012 (0.101; 0.905)          | 0.051 (0.038; 0.177)             |
| <b>Location you need to visit to attend psychological therapy sessions</b>                                                              |                                            |                               |                                  |
| Primary care (GP surgery)                                                                                                               | -0.103 (0.043; 0.016)*                     | 0.061 (0.107; 0.567)          | -0.077 (0.039; 0.051)            |

|                                                                                                                                                                                                                                    |                   |         |                   |         |                   |         |
|------------------------------------------------------------------------------------------------------------------------------------------------------------------------------------------------------------------------------------|-------------------|---------|-------------------|---------|-------------------|---------|
| Community care (NHS clinic in the community)                                                                                                                                                                                       | 0.106<br>0.009)*  | (0.040; | 0.035<br>0.730)   | (0.100; | 0.095<br>0.011)*  | (0.037; |
| Outpatient (clinic at a hospital)                                                                                                                                                                                                  | -0.038<br>0.375)  | (0.042; | 0.029<br>0.781)   | (0.103; | -0.035<br>0.368)  | (0.039; |
| Tertiary care (specialist/University hospital)                                                                                                                                                                                     | 0.035<br>0.406)   | (0.043; | -0.124<br>0.239)  | (0.106; | 0.017<br>0.662)   | (0.039; |
| <b>Additional cost to the NHS</b>                                                                                                                                                                                                  |                   |         |                   |         |                   |         |
| NHS cost                                                                                                                                                                                                                           | -0.001<br>0.000)* | (0.000; | -0.001<br>0.000)* | (0.000; | -0.001<br>0.000)* | (0.000; |
| <b>Therapy provision</b>                                                                                                                                                                                                           |                   |         |                   |         |                   |         |
| Alternative Specific Constant <sup>1</sup>                                                                                                                                                                                         | 0.785<br>0.000)*  | (0.042; | 2.068<br>0.000)*  | (0.165; | 0.870<br>0.000)*  | (0.040; |
| * Statistical significance (P<0.05)                                                                                                                                                                                                |                   |         |                   |         |                   |         |
| <sup>1</sup> This constant represents people's preferences for some form of cardiac rehabilitation (specifically one with the mean effect for each of the qualitative attributes and no cost) versus receiving no rehabilitation). |                   |         |                   |         |                   |         |

Supplementary Figure 1 Swait and Louviere plot of coefficients

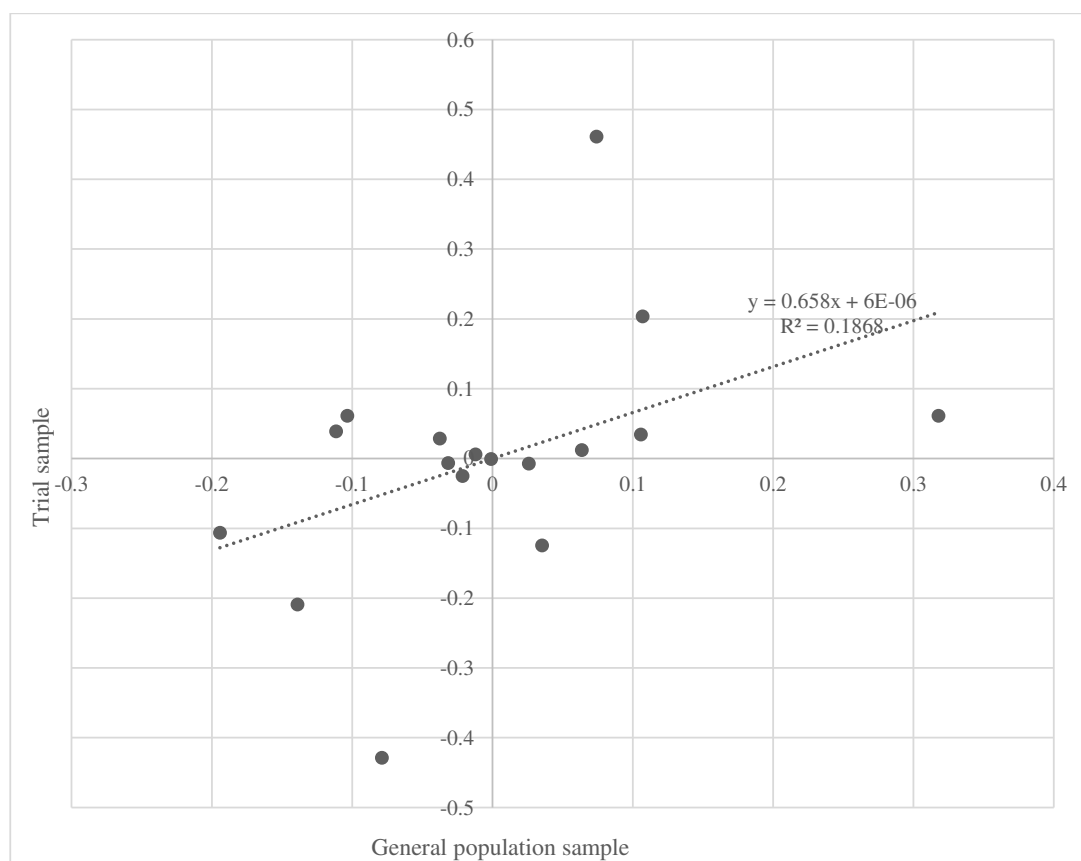

Supplement: bmjopen-2022-062503supp001_data_supplement.pdf [file bmjopen-2022-062503supp001_data_supplement.pdf]
